# Supplementary material for: Separation of Benzene and Cyclohexane Using Eutectic Solvents with Aromatic Structure
Source: MDPI journal article supplement (doi:10.3390/molecules27134041), 2022-06-23
Supplement: s1 [file s1]

## Separation of benzene and cyclohexane using deep eutectic solvents with aromatic structure

Mohamed K. Hadj-Kali<sup>1,\*</sup>, M. Zulhaziman M. Salleh<sup>2,\*</sup>, Irfan Wazeer<sup>1</sup>, Ahmad Alhadid<sup>3</sup>, Sarwono Mulyono<sup>1</sup>

<sup>1</sup> Chemical Engineering Department, King Saud University, P.O. Box 800, Riyadh 11421, Saudi Arabia

<sup>2</sup> Department of Chemical and Process Engineering, Faculty of Engineering and Built Environment, 43600 Bangi, Selangor, Malaysia

<sup>3</sup> Biothermodynamics, TUM School of Life Sciences, Technical University of Munich, Maximus-von-Imhof-Forum 2, D-85354 Freising, Germany

\*Corresponding Authors: [mhadjkali@ksu.edu.sa](mailto:mhadjkali@ksu.edu.sa); [zulhaziman@ukm.edu.my](mailto:zulhaziman@ukm.edu.my)

### List of figures

Figure S1. <sup>1</sup>H NMR spectra in CDCl<sub>3</sub>: (a) pure BTBACl:Ph (1:2) DES; (b) top layer.

Figure S2. <sup>1</sup>H NMR spectra in CDCl<sub>3</sub>: (a) pure BTBACl:Cre (1:2) DES; (b) top layer.

Figure S3. <sup>1</sup>H NMR spectra in CDCl<sub>3</sub>: (a) pure TBPB:PTSA (1:1) DES; (b) top layer.

Figure S4: FTIR analysis for DES TBPB:PTSA (1:1). Red line indicates the tetrabutylphosphonium salt, blue indicates p-toluenesulfonic acid and black indicates the DES.

Figure S5: FTIR analysis for DES BTBACl:m-cresol (1:2). Red line indicates benzyltributylammonium chloride, blue indicates m-cresol and black indicates the DES.

Figure S6: FTIR analysis for DES BTBACl:phenol (1:2). Red line indicates benzyltributylammonium chloride, blue indicates phenol and black indicates the DES.

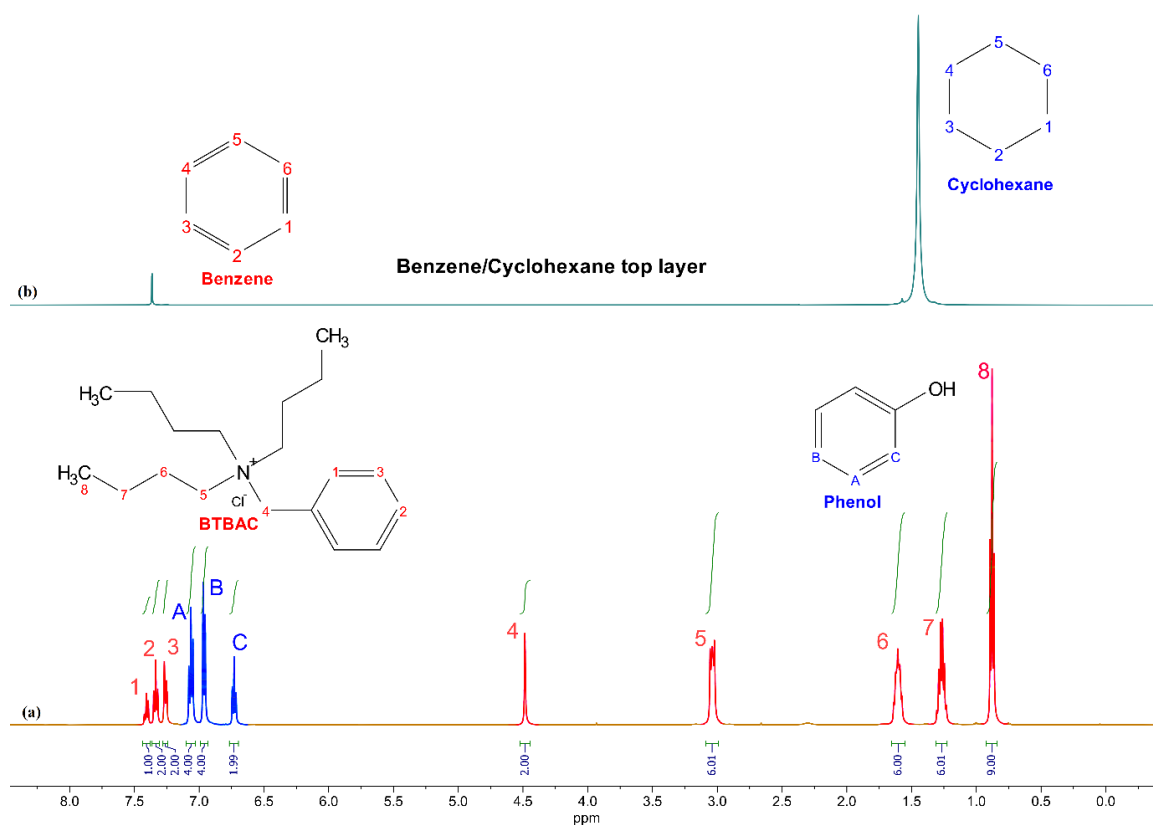

Figure S1.  $^1\text{H}$  NMR spectra in  $\text{CDCl}_3$ : (a) pure BTBACl:Ph (1:2) DES; (b) top layer.

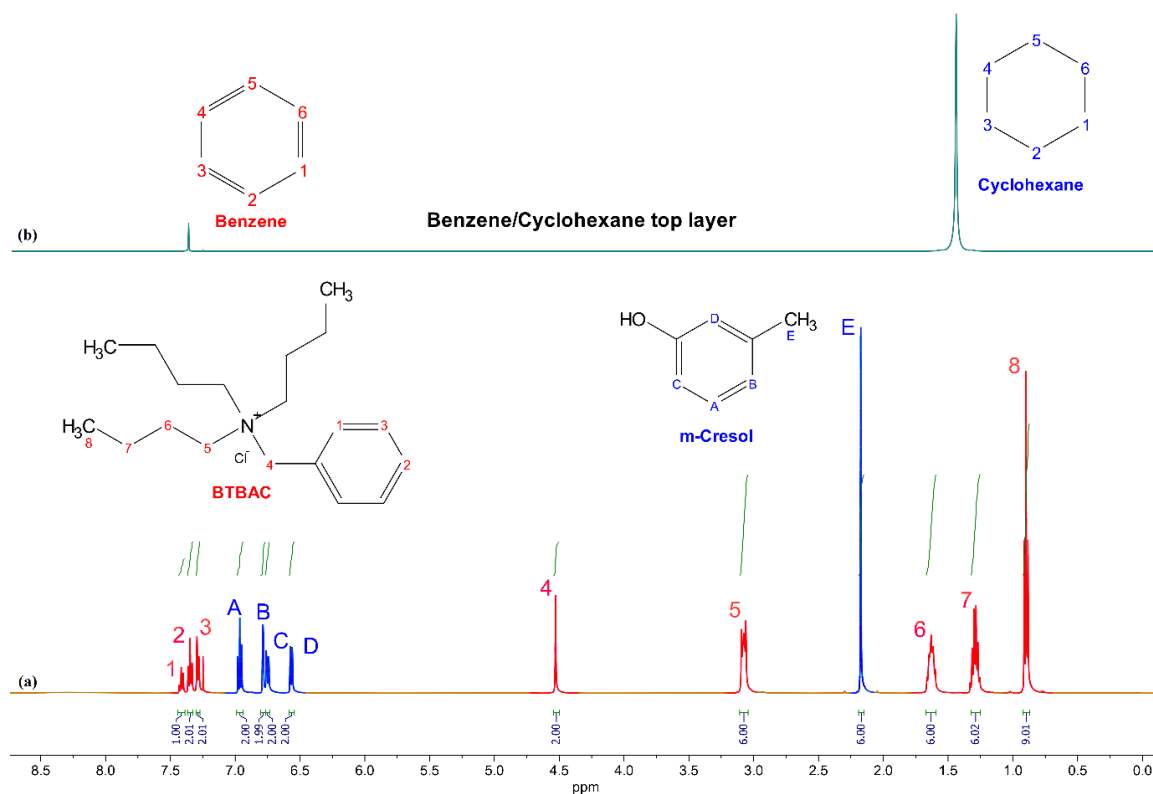

Figure S2.  $^1\text{H}$  NMR spectra in  $\text{CDCl}_3$ : (a) pure BTBACl:Cre (1:2) DES; (b) top layer.

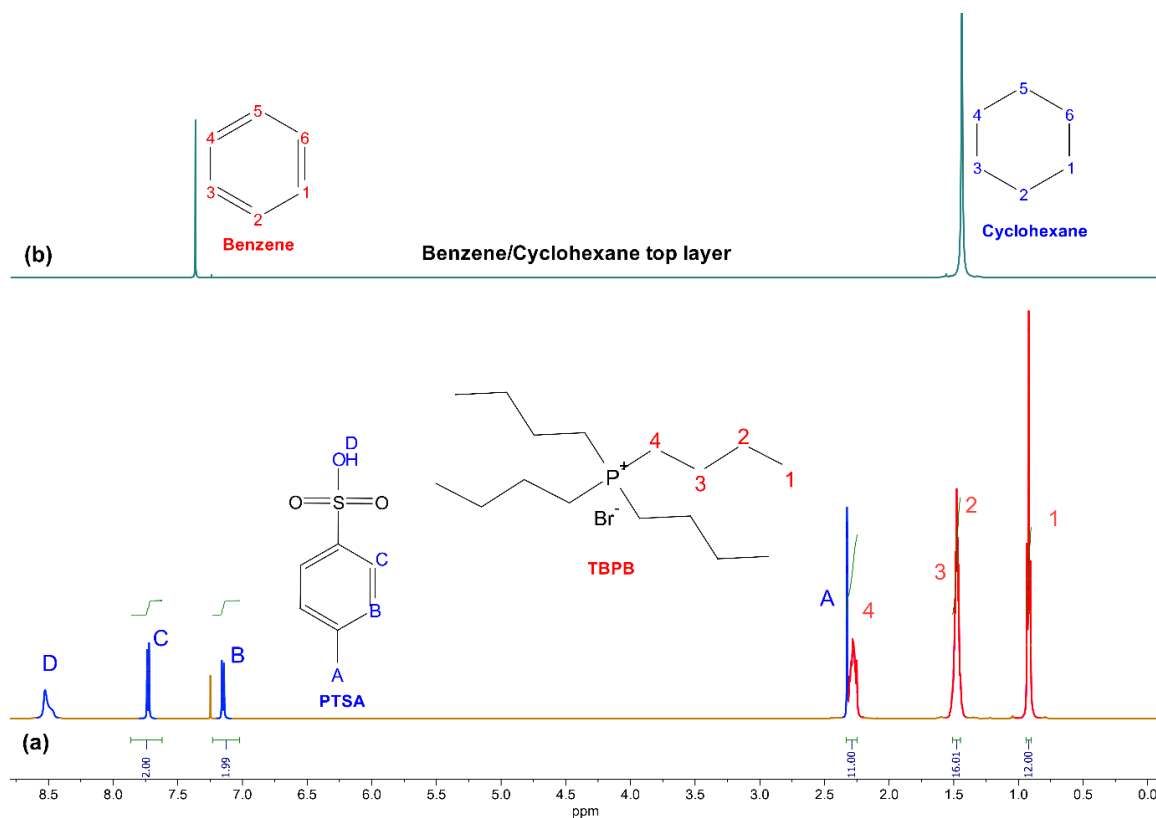

Figure S3.  $^1\text{H}$  NMR spectra in  $\text{CDCl}_3$ : (a) pure TBPB:PTSA (1:1) DES; (b) top layer.

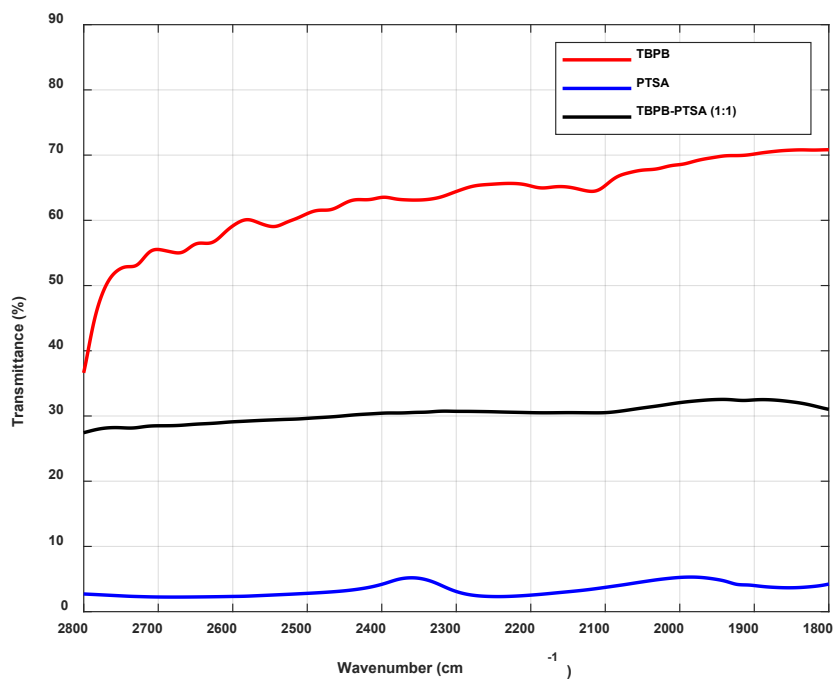

Figure S4: FTIR analysis for DES TBPB:PTSA (1:1). Red line indicates the tetrabutylphosphonium salt, blue indicates p-toluenesulfonic acid and black indicates the DES.

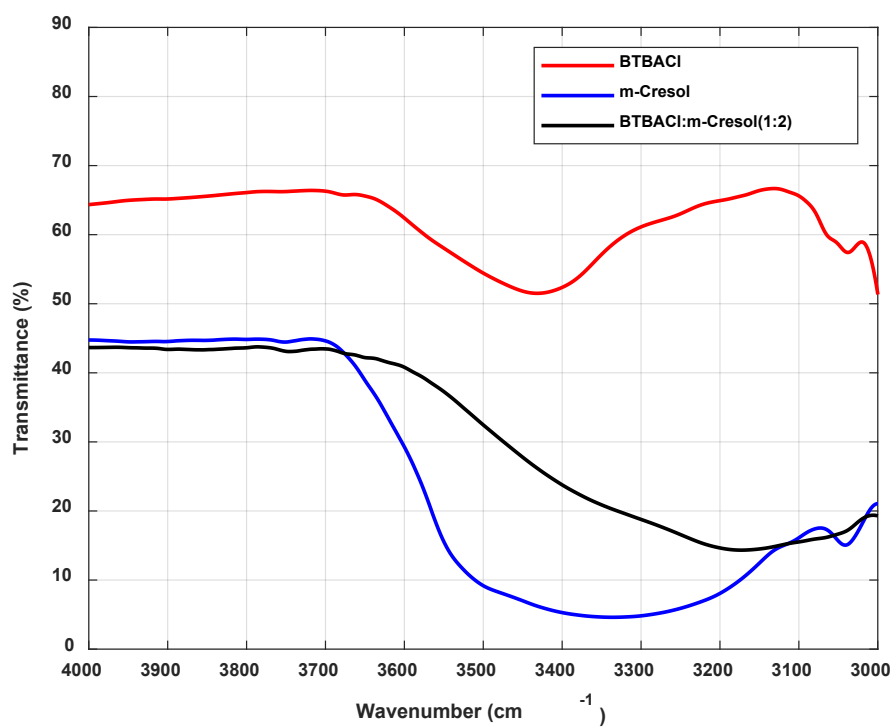

Figure S5: FTIR analysis for DES BTBACl:m-cresol (1:2). Red line indicates benzyltributylammonium chloride, blue indicates m-cresol and black indicates the DES.

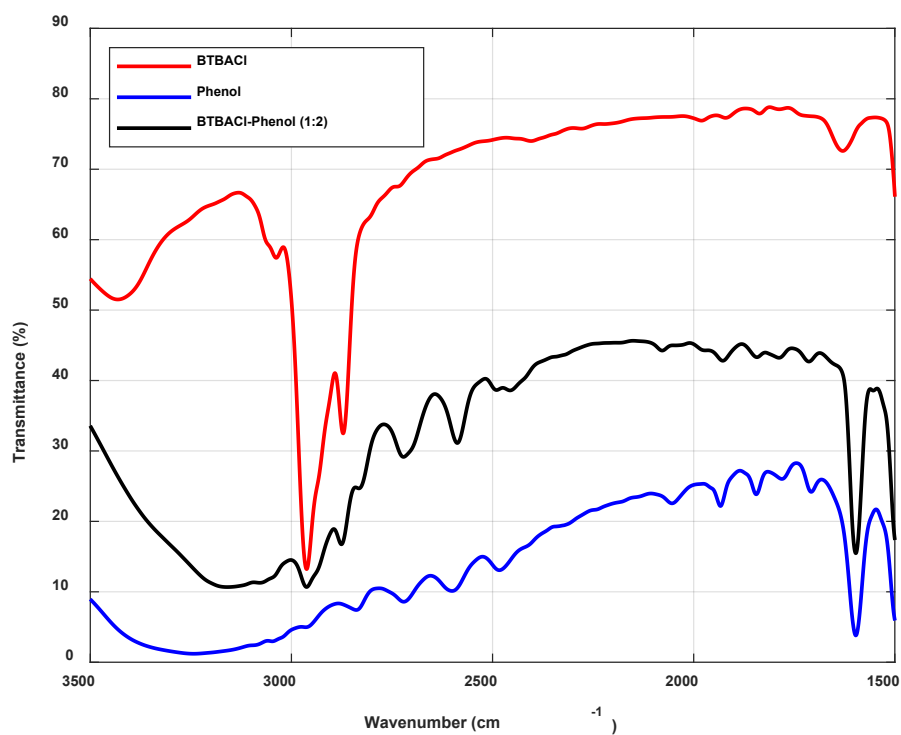

Figure S6: FTIR analysis for DES BTBACl:phenol (1:2). Red line indicates benzyltributylammonium chloride, blue indicates phenol and black indicates the DES.

## List of tables

Table S1. Some examples of DESs applications in various fields.

Table S2. Structures of the studied chemicals.

Table S3: Standard deviation (STDEV) on measured solubilities of Benzene (1) / Cyclohexane (2) mixture with BTBACl:Phenol (1:2) (3) for mole fractions  $x$ : Top layer.

Table S4: STDEV on measured solubilities of Benzene (1) / Cyclohexane (2) mixture with BTBACl:Ph (1:2) (3) for mole fractions  $x$ : Bottom layer.

Table S5: STDEV on measured solubilities of Benzene (1) / Cyclohexane (2) mixture with BTBACl:Cre (1:2) (3) for mole fractions  $x$ : Top layer.

Table S6: STDEV on measured solubilities of Benzene (1) / Cyclohexane (2) mixture with BTBACl:Cre (1:2) (3) for mole fractions  $x$ : Bottom layer.

Table S7: STDEV on measured solubilities of Benzene (1) / Cyclohexane (2) mixture with TBPB:PTSA (1:1) (3) for mole fractions  $x$ : Top layer.

Table S8: STDEV on measured solubilities of Benzene (1) / Cyclohexane (2) mixture with TBPB:PTSA (1:1) (3) for mole fractions  $x$ : Bottom layer.

Table S9: Molar ternary compositions, benzene distribution ratio ( $D_{Bz}$ ) and solvent selectivity ( $S$ ) from previous works involving organic solvents, ILs and DESs.  $x_1$ ,  $x_2$  and  $x_3$  represents the molar composition of benzene, cyclohexane and solvents, respectively.

Table S1. Some examples of DESs applications in various fields.

| Application                                  | Analyte/system                                                                                                            | DESs                                                                                                                                                              | Refs.    |
|----------------------------------------------|---------------------------------------------------------------------------------------------------------------------------|-------------------------------------------------------------------------------------------------------------------------------------------------------------------|----------|
| <b>Separation and CO<sub>2</sub> capture</b> |                                                                                                                           |                                                                                                                                                                   |          |
| Liquid-liquid extraction                     | Heptane/ethaline mixture, removal of volatile fatty acids from aqueous solutions, removal of pertechnate in aqueous media | ChCl <sup>1</sup> :glycerol (1:2), ChCl:levulinic acid (1:2), ChCl:EG <sup>2</sup> (1:2), MTOAC <sup>3</sup> :DA <sup>4</sup> (1:2), MTOB <sup>5</sup> : DA (1:2) | [1-3]    |
| Metal extraction                             | Removal of various metals including indium, boron, copper, cobalt, manganese, cobalt, nickel and lithium                  | DA:lidocaine (2:1), thymol: 1-decanol (2:1), thymol:MPD <sup>6</sup> (2:1), menthol: 1-decanol (2:1), menthol:MPD (2:1)                                           | [4-7]    |
| CO <sub>2</sub> capture                      | solubilization of CO <sub>2</sub>                                                                                         | Betaine:lactic acid (1:1), ChCl:guaiacol (1:1), MTPPB <sup>7</sup> /glycerol (1:3), ChCl:urea (1:2), ChCl:EG (1:2)                                                | [8-12]   |
| <b>Electrodeposition</b>                     |                                                                                                                           |                                                                                                                                                                   |          |
| ionometallurgy                               | Recovery of gold, tellurium, sulphides and tellurides                                                                     | ChCl:EG (1:2)                                                                                                                                                     | [13]     |
| electrodeposition                            | electrodeposition of zinc, tin, indium, cobalt, nickel and Samarium                                                       | ChCl:EG (1:2), ChCl:urea (1:2)                                                                                                                                    | [14-19]  |
| metal oxides solubility                      | Various metal oxides                                                                                                      | ChCl:EG (1:2), ChCl:urea (1:2), ChCl:malonic acid (1:1)                                                                                                           | [20]     |
| <b>Nanotechnology</b>                        |                                                                                                                           |                                                                                                                                                                   |          |
| Synthesis of nanoparticles                   | Gold nanoparticles                                                                                                        | ChCl:urea (1:2)                                                                                                                                                   | [21]     |
| Synthesis of nanoparticles                   | CuCl nanoparticles                                                                                                        | ChCl:urea (1:2)                                                                                                                                                   | [22]     |
| Synthesis of nanocrystals                    | Silver nanocrystals                                                                                                       | silver triflate:acetamide (1:4)                                                                                                                                   | [23]     |
| <b>Organic chemistry</b>                     |                                                                                                                           |                                                                                                                                                                   |          |
| Biochemistry                                 | Glycerol extraction from biodiesel                                                                                        | ChCl:glycerol (1:2), MTPPB:EG (1:3)                                                                                                                               | [24, 25] |
| Enzymatic biodiesel production               | Triglyceride conversion of miglyol oil                                                                                    | ChCl:urea (1:2), ChCl:glycerol (1:2)                                                                                                                              | [26, 27] |
| <b>Solar energy and battery technology</b>   |                                                                                                                           |                                                                                                                                                                   |          |
| Vanadium–iron redox flow battery testing     | Solubility of vanadium and iron                                                                                           | ChCl:urea (1:2), ChCl:EG (1:2)                                                                                                                                    | [28]     |
| Solar energy                                 | Solar cell                                                                                                                | ChCl:glycerol (1:2)                                                                                                                                               | [29, 30] |
| <b>Electrochemical sensor platform</b>       |                                                                                                                           |                                                                                                                                                                   |          |
| Electrochemical sensor                       | Synthesis of nanoporous gold                                                                                              | ChCl:urea (1:2)                                                                                                                                                   | [31]     |

|                        |                                                            |                                        |      |
|------------------------|------------------------------------------------------------|----------------------------------------|------|
| Electrochemical sensor | Determination of nitrofurazone                             | ChCl:urea:glycerol (1:1:1)             | [32] |
| <b>Photosynthesis</b>  |                                                            |                                        |      |
| Photosynthesis         | Photosynthetic reaction centers of rhodobacter sphaeroides | ChCl:EG (1:3), ChCl:malonic acid (1:1) | [33] |

<sup>1</sup>Choline chloride, <sup>2</sup>ethylene glycol, <sup>3</sup>methyltriocetylammmonium chloride, <sup>4</sup>decanoic acid, <sup>5</sup>methyltriocetylammmonium bromide, <sup>6</sup>2-methyl 2,4-pentanediol, <sup>7</sup>methyltriphenylphosphonium bromide

Table S2. Structures of the studied chemicals.

|             |                                                                                      |
|-------------|--------------------------------------------------------------------------------------|
| Benzene     | 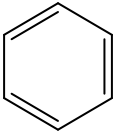  |
| Cyclohexane |   |
| BTBACl      |   |
| Phenol      |  |
| m-Cresol    |  |
| TBPB        |  |
| PTSA        |  |

Table S3: Standard deviation (STDEV) on measured solubilities of Benzene (1) / Cyclohexane (2) mixture with BTBACl:Ph (1:2) (3) for mole fractions x: Top layer

| Mole fraction  |                |                | Average mole fraction |                |                | STDEV mole fraction |                |                |
|----------------|----------------|----------------|-----------------------|----------------|----------------|---------------------|----------------|----------------|
| X <sub>1</sub> | X <sub>2</sub> | X <sub>3</sub> | X <sub>1</sub>        | X <sub>2</sub> | X <sub>3</sub> | X <sub>1</sub>      | X <sub>2</sub> | X <sub>3</sub> |
| 0.0784         | 0.9216         | 0              | 0.0789                | 0.9211         | 0              | 0.0005              | 0.0005         | 0              |
| 0.0793         | 0.9207         | 0              |                       |                |                |                     |                |                |
| 0.0791         | 0.9209         | 0              |                       |                |                |                     |                |                |
| 0.1665         | 0.8335         | 0              | 0.1631                | 0.8369         | 0              | 0.0048              | 0.0048         | 0              |
| 0.1598         | 0.8402         | 0              |                       |                |                |                     |                |                |
| 0.2450         | 0.7550         | 0              | 0.2429                | 0.7571         | 0              | 0.0018              | 0.0018         | 0              |
| 0.2422         | 0.7578         | 0              |                       |                |                |                     |                |                |
| 0.2416         | 0.7584         | 0              |                       |                |                |                     |                |                |
| 0.3230         | 0.6770         | 0              | 0.3225                | 0.6775         | 0              | 0.0005              | 0.0005         | 0              |
| 0.3220         | 0.6780         | 0              |                       |                |                |                     |                |                |
| 0.3224         | 0.6776         | 0              |                       |                |                |                     |                |                |
| 0.4181         | 0.5819         | 0              | 0.4134                | 0.5866         | 0              | 0.0041              | 0.0041         | 0              |
| 0.4114         | 0.5886         | 0              |                       |                |                |                     |                |                |
| 0.4107         | 0.5893         | 0              |                       |                |                |                     |                |                |

Table S4: STDEV on measured solubilities of Benzene (1) / Cyclohexane (2) mixture with BTBACl:Ph (1:2) (3) for mole fractions x: Bottom layer

| Mole fraction  |                |                | Average mole fraction |                |                | STDEV mole fraction |                |                |
|----------------|----------------|----------------|-----------------------|----------------|----------------|---------------------|----------------|----------------|
| X <sub>1</sub> | X <sub>2</sub> | X <sub>3</sub> | X <sub>1</sub>        | X <sub>2</sub> | X <sub>3</sub> | X <sub>1</sub>      | X <sub>2</sub> | X <sub>3</sub> |
| 0.1265         | 0.3524         | 0.5211         | 0.1254                | 0.3505         | 0.5241         | 0.0012              | 0.0046         | 0.0045         |
| 0.1242         | 0.3538         | 0.5220         |                       |                |                |                     |                |                |
| 0.1254         | 0.3452         | 0.5294         |                       |                |                |                     |                |                |
| 0.2159         | 0.3417         | 0.4424         | 0.2235                | 0.3317         | 0.4448         | 0.0107              | 0.0142         | 0.0035         |
| 0.2311         | 0.3217         | 0.4473         |                       |                |                |                     |                |                |
| 0.3130         | 0.3215         | 0.3655         | 0.3160                | 0.3199         | 0.3641         | 0.0029              | 0.0056         | 0.0043         |
| 0.3162         | 0.3246         | 0.3592         |                       |                |                |                     |                |                |
| 0.3188         | 0.3137         | 0.3675         |                       |                |                |                     |                |                |
| 0.4005         | 0.3004         | 0.2991         | 0.4013                | 0.2989         | 0.2998         | 0.0007              | 0.0016         | 0.0011         |
| 0.4017         | 0.2989         | 0.2994         |                       |                |                |                     |                |                |
| 0.4018         | 0.2972         | 0.3010         |                       |                |                |                     |                |                |
| 0.4716         | 0.2645         | 0.2639         | 0.4729                | 0.2746         | 0.2525         | 0.0011              | 0.0088         | 0.0099         |
| 0.4734         | 0.2791         | 0.2475         |                       |                |                |                     |                |                |
| 0.4736         | 0.2803         | 0.2461         |                       |                |                |                     |                |                |



| Mole fraction  |                |                | Average mole fraction |                |                | STDEV mole fraction |                |                |
|----------------|----------------|----------------|-----------------------|----------------|----------------|---------------------|----------------|----------------|
| X <sub>1</sub> | X <sub>2</sub> | X <sub>3</sub> | X <sub>1</sub>        | X <sub>2</sub> | X <sub>3</sub> | X <sub>1</sub>      | X <sub>2</sub> | X <sub>3</sub> |
| 0.0791         | 0.9209         | 0              | 0.0789                | 0.9211         | 0              | 0.0004              | 0.0004         | 0              |
| 0.0792         | 0.9208         | 0              |                       |                |                |                     |                |                |
| 0.0785         | 0.9215         | 0              |                       |                |                |                     |                |                |
| 0.1529         | 0.8471         | 0              | 0.1527                | 0.8473         | 0              | 0.0004              | 0.0004         | 0              |
| 0.1524         | 0.8476         | 0              |                       |                |                |                     |                |                |
| 0.2312         | 0.7688         | 0              | 0.2304                | 0.7696         | 0              | 0.0007              | 0.0007         | 0              |
| 0.2299         | 0.7701         | 0              |                       |                |                |                     |                |                |
| 0.2301         | 0.7699         | 0              |                       |                |                |                     |                |                |
| 0.3240         | 0.6760         | 0              | 0.3229                | 0.6771         | 0              | 0.0011              | 0.0011         | 0              |
| 0.3219         | 0.6781         | 0              |                       |                |                |                     |                |                |
| 0.3227         | 0.6773         | 0              |                       |                |                |                     |                |                |

| Mole fraction |        |        | Average mole fraction |        |        | STDEV mole fraction |        |        |
|---------------|--------|--------|-----------------------|--------|--------|---------------------|--------|--------|
| X1            | X2     | X3     | X1                    | X2     | X3     | X1                  | X2     | X3     |
| 0.1217        | 0.4815 | 0.3968 | 0.1220                | 0.4803 | 0.3977 | 0.0008              | 0.0016 | 0.0009 |
| 0.1215        | 0.4809 | 0.3976 |                       |        |        |                     |        |        |
| 0.1230        | 0.4784 | 0.3986 |                       |        |        |                     |        |        |
| 0.2336        | 0.4605 | 0.3059 | 0.2354                | 0.4531 | 0.3115 | 0.0026              | 0.0105 | 0.0079 |
| 0.2372        | 0.4457 | 0.3171 |                       |        |        |                     |        |        |
| 0.3043        | 0.4641 | 0.2316 | 0.3125                | 0.4324 | 0.2551 | 0.0071              | 0.0275 | 0.0204 |
| 0.3166        | 0.4167 | 0.2667 |                       |        |        |                     |        |        |
| 0.3166        | 0.4163 | 0.2671 |                       |        |        |                     |        |        |
| 0.3832        | 0.4081 | 0.2086 | 0.3831                | 0.4111 | 0.2059 | 0.0012              | 0.0050 | 0.0040 |
| 0.3841        | 0.4082 | 0.2076 |                       |        |        |                     |        |        |
| 0.3819        | 0.4168 | 0.2013 |                       |        |        |                     |        |        |

Table S7: STDEV on measured solubilities of Benzene (1) / Cyclohexane (2) mixture with TBPB:PTSA (1:1) (3) for mole fractions x: Top layer

| Mole fraction  |                |                | Average mole fraction |                |                | STDEV mole fraction |                |                |
|----------------|----------------|----------------|-----------------------|----------------|----------------|---------------------|----------------|----------------|
| X <sub>1</sub> | X <sub>2</sub> | X <sub>3</sub> | X <sub>1</sub>        | X <sub>2</sub> | X <sub>3</sub> | X <sub>1</sub>      | X <sub>2</sub> | X <sub>3</sub> |
| 0.0900         | 0.9100         | 0              | 0.0893                | 0.9107         | 0              | 0.0011              | 0.0011         | 0              |
| 0.0900         | 0.9100         | 0              |                       |                |                |                     |                |                |
| 0.0881         | 0.9119         | 0              |                       |                |                |                     |                |                |
| 0.1786         | 0.8214         | 0              | 0.1785                | 0.8215         | 0              | 0.0019              | 0.0019         | 0              |
| 0.1804         | 0.8196         | 0              |                       |                |                |                     |                |                |
| 0.1766         | 0.8234         | 0              |                       |                |                |                     |                |                |
| 0.2645         | 0.7355         | 0              | 0.2672                | 0.7328         | 0              | 0.0042              | 0.0042         | 0              |
| 0.2649         | 0.7351         | 0              |                       |                |                |                     |                |                |
| 0.2721         | 0.7279         | 0              |                       |                |                |                     |                |                |
| 0.3557         | 0.6443         | 0              | 0.3593                | 0.6407         | 0              | 0.0038              | 0.0038         | 0              |
| 0.3590         | 0.6410         | 0              |                       |                |                |                     |                |                |
| 0.3632         | 0.6368         | 0              |                       |                |                |                     |                |                |
| 0.4548         | 0.5452         | 0              | 0.4607                | 0.5393         | 0              | 0.0092              | 0.0092         | 0              |
| 0.4559         | 0.5441         | 0              |                       |                |                |                     |                |                |
| 0.4713         | 0.5287         | 0              |                       |                |                |                     |                |                |
| 0.5505         | 0.4495         | 0              | 0.5526                | 0.4474         | 0              | 0.0026              | 0.0026         | 0              |
| 0.5517         | 0.4483         | 0              |                       |                |                |                     |                |                |
| 0.5555         | 0.4445         | 0              |                       |                |                |                     |                |                |

Table S8: STDEV on measured solubilities of Benzene (1) / Cyclohexane (2) mixture with TBPB:PTSA (1:1) (3) for mole fractions x: Bottom layer

| Mole fraction  |                |                | Average mole fraction |                |                | STDEV mole fraction |                |                |
|----------------|----------------|----------------|-----------------------|----------------|----------------|---------------------|----------------|----------------|
| X <sub>1</sub> | X <sub>2</sub> | X <sub>3</sub> | X <sub>1</sub>        | X <sub>2</sub> | X <sub>3</sub> | X <sub>1</sub>      | X <sub>2</sub> | X <sub>3</sub> |
| 0.1038         | 0.2134         | 0.6827         | 0.1064                | 0.2041         | 0.6895         | 0.0040              | 0.0123         | 0.0139         |
| 0.1043         | 0.1901         | 0.7056         |                       |                |                |                     |                |                |
| 0.1111         | 0.2086         | 0.6803         |                       |                |                |                     |                |                |
| 0.2016         | 0.1921         | 0.6063         | 0.2018                | 0.1899         | 0.6083         | 0.0064              | 0.0048         | 0.0109         |
| 0.1955         | 0.1845         | 0.6201         |                       |                |                |                     |                |                |
| 0.2082         | 0.1933         | 0.5986         |                       |                |                |                     |                |                |
| 0.2989         | 0.2113         | 0.4898         | 0.2925                | 0.1955         | 0.5120         | 0.0111              | 0.0164         | 0.0267         |
| 0.2989         | 0.1965         | 0.5046         |                       |                |                |                     |                |                |
| 0.2797         | 0.1786         | 0.5417         |                       |                |                |                     |                |                |
| 0.3760         | 0.1817         | 0.4423         | 0.3677                | 0.1752         | 0.4571         | 0.0089              | 0.0063         | 0.0152         |
| 0.3687         | 0.1748         | 0.4565         |                       |                |                |                     |                |                |
| 0.3583         | 0.1691         | 0.4726         |                       |                |                |                     |                |                |
| 0.4263         | 0.1641         | 0.4096         | 0.4093                | 0.1565         | 0.4342         | 0.0271              | 0.0103         | 0.0373         |
| 0.4235         | 0.1607         | 0.4158         |                       |                |                |                     |                |                |
| 0.3781         | 0.1448         | 0.4771         |                       |                |                |                     |                |                |
| 0.5158         | 0.1639         | 0.3202         | 0.5116                | 0.1589         | 0.3295         | 0.0050              | 0.0044         | 0.0089         |
| 0.5129         | 0.1570         | 0.3301         |                       |                |                |                     |                |                |
| 0.5062         | 0.1558         | 0.3380         |                       |                |                |                     |                |                |

Table S9: Molar ternary compositions, benzene distribution ratio ( $D_{Bz}$ ) and solvent selectivity (S) from previous works involving organic solvents, ILs and DESs.  $x_1$ ,  $x_2$  and  $x_3$  represents the molar composition of benzene, cyclohexane and solvents, respectively.

| Top layer                                            |                |                    | Bottom layer   |                |                | D <sub>Bz</sub> | S       |
|------------------------------------------------------|----------------|--------------------|----------------|----------------|----------------|-----------------|---------|
| x <sub>1</sub>                                       | x <sub>2</sub> | x <sub>3</sub>     | x <sub>1</sub> | x <sub>2</sub> | x <sub>3</sub> |                 |         |
| Benzene (1) + cyclohexane + sulfolane (3)            |                |                    |                |                |                |                 |         |
| 0.036                                                | 0.963          | 1x10 <sup>-3</sup> | 0.015          | 0.027          | 0.958          | 0.417           | 14.86   |
| 0.133                                                | 0.856          | 0.011              | 0.069          | 0.037          | 0.894          | 0.519           | 12.00   |
| 0.158                                                | 0.829          | 0.013              | 0.086          | 0.038          | 0.876          | 0.544           | 11.87   |
| 0.217                                                | 0.764          | 0.019              | 0.118          | 0.039          | 0.843          | 0.544           | 10.65   |
| 0.268                                                | 0.701          | 0.031              | 0.156          | 0.05           | 0.794          | 0.582           | 8.16    |
| 0.31                                                 | 0.649          | 0.041              | 0.186          | 0.055          | 0.759          | 0.6             | 7.08    |
| 0.356                                                | 0.586          | 0.058              | 0.225          | 0.065          | 0.71           | 0.632           | 5.698   |
| 0.394                                                | 0.53           | 0.076              | 0.263          | 0.078          | 0.659          | 0.667           | 4.54    |
| 0.433                                                | 0.458          | 0.109              | 0.314          | 0.099          | 0.587          | 0.725           | 3.35    |
| 0.457                                                | 0.387          | 0.156              | 0.361          | 0.13           | 0.509          | 0.79            | 2.35    |
| Benzene (1) + cyclohexane + ethylene glycol (3)      |                |                    |                |                |                |                 |         |
| 0.258                                                | 0.74           | 0.002              | 0.0348         | 0.0021         | 0.965          | 0.13            | 47.53   |
| 0.464                                                | 0.53           | 0.004              | 0.086          | 0.0021         | 0.912          | 0.19            | 46.78   |
| 0.66                                                 | 0.33           | 0.005              | 0.172          | 0.0045         | 0.823          | 0.26            | 19.11   |
| 0.831                                                | 0.161          | 0.008              | 0.221          | 0.0045         | 0.774          | 0.26            | 9.51    |
| Benzene (1) + cyclohexane + dimethylformamide (3)    |                |                    |                |                |                |                 |         |
| 0.0243                                               | 0.8907         | 0.085              | 0.0219         | 0.2677         | 0.7105         | 0.90123         | 2.99862 |
| 0.0758                                               | 0.8112         | 0.113              | 0.0652         | 0.3321         | 0.6027         | 0.86016         | 2.10106 |
| 0.1106                                               | 0.6542         | 0.2352             | 0.1018         | 0.3752         | 0.523          | 0.92043         | 1.60487 |
| Benzene (1) + cyclohexane (2) + TBABr:Sulf (1:7) (3) |                |                    |                |                |                |                 |         |
| 0.101                                                | 0.899          | 0.000              | 0.020          | 0.013          | 0.967          | 0.196           | 13.354  |
| 0.194                                                | 0.806          | 0.000              | 0.041          | 0.014          | 0.944          | 0.212           | 11.966  |
| 0.284                                                | 0.716          | 0.000              | 0.059          | 0.015          | 0.926          | 0.209           | 9.859   |
| 0.366                                                | 0.634          | 0.000              | 0.081          | 0.017          | 0.902          | 0.222           | 8.164   |
| 0.471                                                | 0.529          | 0.000              | 0.104          | 0.018          | 0.878          | 0.222           | 6.500   |
| 0.562                                                | 0.438          | 0.000              | 0.134          | 0.021          | 0.845          | 0.238           | 4.902   |
| Benzene (1) + cyclohexane (2) + TBABr:TEG (1:4) (3)  |                |                    |                |                |                |                 |         |
| 0.099                                                | 0.901          | 0.000              | 0.017          | 0.018          | 0.965          | 0.171           | 8.322   |
| 0.203                                                | 0.797          | 0.000              | 0.028          | 0.016          | 0.956          | 0.136           | 6.582   |
| 0.279                                                | 0.721          | 0.000              | 0.036          | 0.019          | 0.944          | 0.130           | 4.831   |
| 0.367                                                | 0.633          | 0.000              | 0.055          | 0.013          | 0.931          | 0.150           | 7.039   |
| 0.478                                                | 0.522          | 0.000              | 0.070          | 0.016          | 0.914          | 0.145           | 4.702   |
| 0.576                                                | 0.424          | 0.000              | 0.086          | 0.015          | 0.899          | 0.149           | 4.257   |
| 0.678                                                | 0.322          | 0.000              | 0.104          | 0.016          | 0.880          | 0.153           | 3.073   |
| 0.774                                                | 0.226          | 0.000              | 0.128          | 0.016          | 0.856          | 0.166           | 2.301   |
| Benzene (1) + cyclohexane (2) + MTPPBr:TEG (1:4) (3) |                |                    |                |                |                |                 |         |
| 0.106                                                | 0.894          | 0.000              | 0.011          | 0.010          | 0.979          | 0.105           | 12.882  |
| 0.197                                                | 0.803          | 0.000              | 0.023          | 0.007          | 0.971          | 0.115           | 14.102  |
| 0.294                                                | 0.706          | 0.000              | 0.033          | 0.009          | 0.958          | 0.113           | 9.220   |
| 0.387                                                | 0.613          | 0.000              | 0.041          | 0.005          | 0.954          | 0.106           | 12.846  |
| 0.492                                                | 0.508          | 0.000              | 0.054          | 0.007          | 0.939          | 0.109           | 7.868   |
| 0.590                                                | 0.410          | 0.000              | 0.066          | 0.006          | 0.928          | 0.112           | 7.630   |

|                                                     |       |       |       |       |       |       |        |
|-----------------------------------------------------|-------|-------|-------|-------|-------|-------|--------|
| 0.692                                               | 0.308 | 0.000 | 0.081 | 0.006 | 0.914 | 0.117 | 6.190  |
| 0.828                                               | 0.172 | 0.000 | 0.103 | 0.005 | 0.893 | 0.124 | 4.493  |
| Benzene (1) + cyclohexane (2) + MTPPBr:PD (1:4) (3) |       |       |       |       |       |       |        |
| 0.110                                               | 0.890 | 0.000 | 0.010 | 0.010 | 0.980 | 0.093 | 8.024  |
| 0.214                                               | 0.786 | 0.000 | 0.018 | 0.010 | 0.972 | 0.083 | 6.578  |
| 0.298                                               | 0.702 | 0.000 | 0.023 | 0.010 | 0.967 | 0.077 | 5.526  |
| 0.403                                               | 0.597 | 0.000 | 0.033 | 0.009 | 0.958 | 0.081 | 5.217  |
| 0.502                                               | 0.498 | 0.000 | 0.044 | 0.009 | 0.947 | 0.087 | 4.630  |
| 0.602                                               | 0.398 | 0.000 | 0.055 | 0.008 | 0.938 | 0.091 | 4.741  |
| 0.703                                               | 0.297 | 0.000 | 0.061 | 0.008 | 0.931 | 0.087 | 3.208  |
| 0.792                                               | 0.208 | 0.000 | 0.077 | 0.009 | 0.914 | 0.097 | 2.186  |
| Benzene (1) + cyclohexane (2) + ChCl:TEG (1:4) (3)  |       |       |       |       |       |       |        |
| 0.094                                               | 0.906 | 0.000 | 0.007 | 0.007 | 0.986 | 0.074 | 9.130  |
| 0.197                                               | 0.803 | 0.000 | 0.014 | 0.006 | 0.980 | 0.070 | 9.613  |
| 0.292                                               | 0.708 | 0.000 | 0.020 | 0.004 | 0.976 | 0.069 | 12.091 |
| 0.399                                               | 0.601 | 0.000 | 0.027 | 0.004 | 0.969 | 0.067 | 9.032  |
| 0.502                                               | 0.498 | 0.000 | 0.032 | 0.004 | 0.964 | 0.064 | 8.228  |
| 0.607                                               | 0.393 | 0.000 | 0.040 | 0.004 | 0.955 | 0.067 | 6.100  |
| 0.704                                               | 0.296 | 0.000 | 0.048 | 0.004 | 0.948 | 0.068 | 4.896  |
| 0.809                                               | 0.191 | 0.000 | 0.057 | 0.003 | 0.940 | 0.071 | 4.749  |
| Benzene (1) + cyclohexane (2) + [C2mim][Ac] (3)     |       |       |       |       |       |       |        |
| 0.085                                               | 0.915 | 0.000 | 0.036 | 0.021 | 0.943 | 0.42  | 18.34  |
| 0.175                                               | 0.825 | 0.000 | 0.085 | 0.069 | 0.847 | 0.48  | 10.33  |
| 0.264                                               | 0.736 | 0.000 | 0.140 | 0.040 | 0.820 | 0.53  | 10.15  |
| 0.360                                               | 0.640 | 0.000 | 0.180 | 0.034 | 0.776 | 0.50  | 9.56   |
| 0.462                                               | 0.538 | 0.000 | 0.212 | 0.033 | 0.755 | 0.46  | 7.44   |
| 0.561                                               | 0.439 | 0.000 | 0.218 | 0.040 | 0.742 | 0.39  | 4.26   |
| Benzene (1) + cyclohexane (2) + [C2mim][SCN] (3)    |       |       |       |       |       |       |        |
| 0.082                                               | 0.918 | 0.000 | 0.038 | 0.010 | 0.953 | 0.46  | 44.71  |
| 0.168                                               | 0.832 | 0.000 | 0.077 | 0.012 | 0.910 | 0.46  | 31.18  |
| 0.259                                               | 0.741 | 0.000 | 0.114 | 0.010 | 0.876 | 0.44  | 32.73  |
| 0.351                                               | 0.649 | 0.000 | 0.149 | 0.009 | 0.842 | 0.42  | 30.94  |
| 0.450                                               | 0.550 | 0.000 | 0.184 | 0.008 | 0.808 | 0.41  | 26.53  |
| 0.553                                               | 0.447 | 0.000 | 0.222 | 0.007 | 0.771 | 0.40  | 25.22  |
| Benzene (1) + cyclohexane (2) + [C2mim][N(CN)2] (3) |       |       |       |       |       |       |        |
| 0.073                                               | 0.927 | 0.000 | 0.049 | 0.020 | 0.932 | 0.67  | 31.85  |
| 0.158                                               | 0.842 | 0.000 | 0.095 | 0.018 | 0.886 | 0.61  | 27.94  |
| 0.247                                               | 0.753 | 0.000 | 0.141 | 0.016 | 0.844 | 0.57  | 27.48  |
| 0.339                                               | 0.661 | 0.000 | 0.184 | 0.015 | 0.801 | 0.54  | 23.51  |
| 0.426                                               | 0.574 | 0.000 | 0.232 | 0.016 | 0.752 | 0.54  | 19.23  |
| 0.522                                               | 0.478 | 0.000 | 0.275 | 0.015 | 0.710 | 0.53  | 16.84  |
| Benzene (1) + cyclohexane (2) + [C2mim][Tf2N] (3)   |       |       |       |       |       |       |        |
| 0.078                                               | 0.922 | 0.000 | 0.095 | 0.059 | 0.846 | 1.22  | 19.09  |
| 0.157                                               | 0.843 | 0.000 | 0.185 | 0.058 | 0.757 | 1.18  | 17.14  |
| 0.243                                               | 0.757 | 0.000 | 0.259 | 0.057 | 0.685 | 1.07  | 14.28  |
| 0.332                                               | 0.668 | 0.000 | 0.331 | 0.054 | 0.615 | 1.00  | 12.36  |
| 0.417                                               | 0.583 | 0.000 | 0.396 | 0.054 | 0.549 | 0.95  | 10.24  |
| 0.518                                               | 0.482 | 0.000 | 0.459 | 0.054 | 0.487 | 0.89  | 7.91   |

| Benzene (1) + cyclohexane (2) + [C4mim][Tf2N] (3)  |        |        |        |        |        |       |       |
|----------------------------------------------------|--------|--------|--------|--------|--------|-------|-------|
| 0.04                                               | 0.96   | 0.000  | 0.066  | 0.162  | 0.772  | 0.168 | 9.78  |
| 0.124                                              | 0.876  | 0.000  | 0.186  | 0.156  | 0.658  | 0.178 | 8.42  |
| 0.177                                              | 0.823  | 0.000  | 0.258  | 0.153  | 0.589  | 0.18  | 7.84  |
| 0.23                                               | 0.77   | 0.000  | 0.301  | 0.146  | 0.553  | 0.19  | 6.90  |
| 0.277                                              | 0.723  | 0.000  | 0.355  | 0.139  | 0.506  | 0.19  | 6.67  |
| 0.352                                              | 0.648  | 0.000  | 0.413  | 0.13   | 0.457  | 0.20  | 5.85  |
| 0.439                                              | 0.561  | 0.000  | 0.478  | 0.117  | 0.405  | 0.21  | 5.22  |
| 0.524                                              | 0.476  | 0.000  | 0.537  | 0.104  | 0.359  | 0.22  | 4.69  |
| 0.62                                               | 0.38   | 0.000  | 0.595  | 0.09   | 0.315  | 0.24  | 4.05  |
| 0.784                                              | 0.216  | 0.000  | 0.705  | 0.051  | 0.244  | 0.24  | 3.81  |
| Benzene (1) + cyclohexane (2) + [C4mim][PF6] (3)   |        |        |        |        |        |       |       |
| 0.0392                                             | 0.9608 | 0.000  | 0.0542 | 0.0269 | 0.9189 | 1.384 | 49.4  |
| 0.0795                                             | 0.9205 | 0.000  | 0.1098 | 0.0319 | 0.8583 | 1.382 | 39.9  |
| 0.1628                                             | 0.8372 | 0.000  | 0.1647 | 0.0368 | 0.7985 | 1.012 | 23    |
| 0.2481                                             | 0.7519 | 0.000  | 0.2375 | 0.0327 | 0.7298 | 0.957 | 22    |
| 0.3507                                             | 0.6493 | 0.000  | 0.2723 | 0.0395 | 0.6882 | 0.776 | 12.8  |
| 0.449                                              | 0.551  | 0.000  | 0.324  | 0.0311 | 0.6449 | 0.721 | 12.8  |
| 0.6462                                             | 0.3538 | 0.000  | 0.4321 | 0.0245 | 0.5434 | 0.669 | 9.7   |
| 0.8724                                             | 0.1276 | 0.000  | 0.54   | 0.012  | 0.448  | 0.619 | 6.6   |
| Benzene (1) + cyclohexane (2) + [C4mim][BF4] (3)   |        |        |        |        |        |       |       |
| 0.046                                              | 0.954  | 0.000  | 0.031  | 0.008  | 0.961  | 0.67  | 80.36 |
| 0.092                                              | 0.908  | 0.000  | 0.066  | 0.012  | 0.922  | 0.71  | 54.28 |
| 0.165                                              | 0.835  | 0.000  | 0.102  | 0.019  | 0.879  | 0.62  | 27.17 |
| 0.245                                              | 0.755  | 0.000  | 0.153  | 0.026  | 0.821  | 0.62  | 18.13 |
| 0.399                                              | 0.601  | 0.000  | 0.245  | 0.034  | 0.721  | 0.61  | 10.85 |
| 0.523                                              | 0.477  | 0.000  | 0.326  | 0.042  | 0.632  | 0.62  | 7.08  |
| 0.682                                              | 0.318  | 0.000  | 0.465  | 0.057  | 0.478  | 0.68  | 3.80  |
| 0.837                                              | 0.163  | 0.000  | 0.646  | 0.039  | 0.315  | 0.77  | 3.22  |
| Benzene (1) + cyclohexane (2) + [C2mim][EtSO4] (3) |        |        |        |        |        |       |       |
| 0.054                                              | 0.946  | 0.000  | 0.034  | 0.03   | 0.936  | 0.63  | 19.85 |
| 0.11                                               | 0.89   | 0.000  | 0.061  | 0.031  | 0.908  | 0.55  | 15.92 |
| 0.166                                              | 0.834  | 0.000  | 0.084  | 0.031  | 0.885  | 0.51  | 13.61 |
| 0.223                                              | 0.777  | 0.000  | 0.112  | 0.03   | 0.858  | 0.50  | 13.00 |
| 0.349                                              | 0.651  | 0.000  | 0.171  | 0.026  | 0.803  | 0.49  | 12.27 |
| 0.47                                               | 0.53   | 0.000  | 0.222  | 0.021  | 0.757  | 0.47  | 11.92 |
| 0.591                                              | 0.409  | 0.000  | 0.273  | 0.017  | 0.71   | 0.46  | 11.11 |
| 0.726                                              | 0.274  | 0.000  | 0.33   | 0.011  | 0.659  | 0.45  | 11.32 |
| 0.862                                              | 0.138  | 0.000  | 0.389  | 0.006  | 0.605  | 0.45  | 10.38 |
| Benzene (1) + cyclohexane (2) + [C4mim][AlCl4] (3) |        |        |        |        |        |       |       |
| 0.0438                                             | 0.9079 | 0.0483 | 0.055  | 0.0524 | 0.8926 | 1.26  | 21.76 |
| 0.0887                                             | 0.8616 | 0.0497 | 0.1099 | 0.0498 | 0.8403 | 1.24  | 21.44 |
| 0.1444                                             | 0.807  | 0.0486 | 0.1536 | 0.0419 | 0.8045 | 1.06  | 20.45 |
| 0.1948                                             | 0.7533 | 0.0519 | 0.2033 | 0.0457 | 0.751  | 1.04  | 17.20 |
| 0.2525                                             | 0.6857 | 0.0618 | 0.2471 | 0.0415 | 0.7114 | 0.97  | 16.17 |
| 0.3035                                             | 0.6214 | 0.0751 | 0.2972 | 0.0366 | 0.6662 | 0.98  | 16.63 |
| 0.4122                                             | 0.5008 | 0.087  | 0.3759 | 0.0335 | 0.5906 | 0.91  | 13.63 |

## References

- [1] F. S. Oliveira, A. B. Pereiro, L. P. Rebelo, and I. M. Marrucho, "Deep eutectic solvents as extraction media for azeotropic mixtures," *Green Chemistry*, vol. 15, no. 5, pp. 1326-1330, 2013.
- [2] D. J. van Osch, L. F. Zubeir, A. van den Bruinhorst, M. A. Rocha, and M. C. Kroon, "Hydrophobic deep eutectic solvents as water-immiscible extractants," *Green Chemistry*, vol. 17, no. 9, pp. 4518-4521, 2015.
- [3] T. E. Phelps, N. Bhawawet, S. S. Jurisson, and G. A. Baker, "Efficient and selective extraction of  $^{99m}\text{TcO}_4^-$  from aqueous media using hydrophobic deep eutectic solvents," *ACS Sustainable Chemistry & Engineering*, vol. 6, no. 11, pp. 13656-13661, 2018.
- [4] N. Schaeffer, M. A. Martins, C. M. Neves, S. P. Pinho, and J. A. Coutinho, "Sustainable hydrophobic terpene-based eutectic solvents for the extraction and separation of metals," *Chemical Communications*, vol. 54, no. 58, pp. 8104-8107, 2018.
- [5] E. Tereshatov, M. Y. Boltoeva, and C. Folden, "First evidence of metal transfer into hydrophobic deep eutectic and low-transition-temperature mixtures: indium extraction from hydrochloric and oxalic acids," *Green Chem.*, vol. 18, no. 17, pp. 4616-4622, 2016.
- [6] G. Alm Mustafa, R. Sulaiman, M. Kumar, I. Adeyemi, H. A. Arafat, and I. AlNashef, "Boron extraction from aqueous medium using novel hydrophobic deep eutectic solvents," *Chemical Engineering Journal*, vol. 395, p. 125173, 2020.
- [7] G. Zante, A. Braun, A. Masmoudi, R. Barillon, D. Trebouet, and M. Boltoeva, "Solvent extraction fractionation of manganese, cobalt, nickel and lithium using ionic liquids and deep eutectic solvents," *Miner. Eng.*, vol. 156, p. 106512, 2020.
- [8] X. Liu, B. Gao, Y. Jiang, N. Ai, and D. Deng, "Solubilities and thermodynamic properties of carbon dioxide in guaiacol-based deep eutectic solvents," *Journal of Chemical & Engineering Data*, vol. 62, no. 4, pp. 1448-1455, 2017.
- [9] T. Altamash *et al.*, "Gas solubility and rheological behavior study of betaine and alanine based natural deep eutectic solvents (NADES)," *J. Mol. Liq.*, vol. 256, pp. 286-295, 2018.
- [10] S. Sarmad, Y. Xie, J.-P. Mikkola, and X. Ji, "Screening of deep eutectic solvents (DESs) as green CO<sub>2</sub> sorbents: from solubility to viscosity," *New J. Chem.*, vol. 41, no. 1, pp. 290-301, 2017.
- [11] X. Li, M. Hou, B. Han, X. Wang, and L. Zou, "Solubility of CO<sub>2</sub> in a choline chloride+ urea eutectic mixture," *J. Chem. Eng. Data*, vol. 53, no. 2, pp. 548-550, 2008.
- [12] R. B. Leron and M.-H. Li, "Solubility of carbon dioxide in a choline chloride–ethylene glycol based deep eutectic solvent," *Thermochimica acta*, vol. 551, pp. 14-19, 2013.
- [13] G. R. Jenkin *et al.*, "The application of deep eutectic solvent ionic liquids for environmentally-friendly dissolution and recovery of precious metals," *Miner. Eng.*, vol. 87, pp. 18-24, 2016.
- [14] A. P. Abbott, G. Capper, K. J. McKenzie, and K. S. Ryder, "Electrodeposition of zinc–tin alloys from deep eutectic solvents based on choline chloride," *Journal of Electroanalytical Chemistry*, vol. 599, no. 2, pp. 288-294, 2007.
- [15] Y. You, C. Gu, X. Wang, and J. Tu, "Electrodeposition of Ni–Co alloys from a deep eutectic solvent," *Surface and Coatings Technology*, vol. 206, no. 17, pp. 3632-3638, 2012.
- [16] J. C. Malaquias, M. Steichen, M. Thomassey, and P. J. Dale, "Electrodeposition of Cu–In alloys from a choline chloride based deep eutectic solvent for photovoltaic applications," *Electrochim. Acta*, vol. 103, pp. 15-22, 2013.
- [17] E. Gómez, P. Cojocar, L. Magagnin, and E. Valles, "Electrodeposition of Co, Sm and SmCo from a deep eutectic solvent," *Journal of electroanalytical chemistry*, vol. 658, no. 1-2, pp. 18-24, 2011.
- [18] C. Gu and J. Tu, "One-step fabrication of nanostructured Ni film with lotus effect from deep eutectic solvent," *Langmuir*, vol. 27, no. 16, pp. 10132-10140, 2011.
- [19] A. H. Whitehead, M. Pölzler, and B. Gollas, "Zinc electrodeposition from a deep eutectic system containing choline chloride and ethylene glycol," *Journal of the Electrochemical Society*, vol. 157, no. 6, p. D328, 2010.

- [20] A. P. Abbott, G. Capper, D. L. Davies, K. J. McKenzie, and S. U. Obi, "Solubility of metal oxides in deep eutectic solvents based on choline chloride," *J. Chem. Eng. Data*, vol. 51, no. 4, pp. 1280-1282, 2006.
- [21] V. S. Raghuwanshi, M. Ochmann, A. Hoell, F. Polzer, and K. Rademann, "Deep eutectic solvents for the self-assembly of gold nanoparticles: a SAXS, UV-Vis, and TEM investigation," *Langmuir*, vol. 30, no. 21, pp. 6038-6046, 2014.
- [22] Y. Huang *et al.*, "Synthesis and characterization of CuCl nanoparticles in deep eutectic solvents," *Particulate Science and Technology*, vol. 31, no. 1, pp. 81-84, 2013.
- [23] L. Adhikari, N. E. Larm, and G. A. Baker, "Argentous deep eutectic solvent approach for scaling up the production of colloidal silver nanocrystals," *ACS Sustainable Chem. Eng.*, vol. 7, no. 13, pp. 11036-11043, 2019.
- [24] M. Hayyan, F. S. Mjalli, M. A. Hashim, and I. M. AlNashef, "A novel technique for separating glycerine from palm oil-based biodiesel using ionic liquids," *Fuel Processing Technology*, vol. 91, no. 1, pp. 116-120, 2010.
- [25] A. P. Abbott, P. M. Cullis, M. J. Gibson, R. C. Harris, and E. Raven, "Extraction of glycerol from biodiesel into a eutectic based ionic liquid," *Green Chem.*, vol. 9, no. 8, pp. 868-872, 2007.
- [26] H. Zhao, G. A. Baker, and S. Holmes, "New eutectic ionic liquids for lipase activation and enzymatic preparation of biodiesel," *Organic & biomolecular chemistry*, vol. 9, no. 6, pp. 1908-1916, 2011.
- [27] H. Zhao, C. Zhang, and T. D. Crittle, "Choline-based deep eutectic solvents for enzymatic preparation of biodiesel from soybean oil," *Journal of Molecular Catalysis B: Enzymatic*, vol. 85, pp. 243-247, 2013.
- [28] Q. Xu *et al.*, "A deep eutectic solvent (DES) electrolyte-based vanadium-iron redox flow battery enabling higher specific capacity and improved thermal stability," *Electrochim. Acta*, vol. 293, pp. 426-431, 2019.
- [29] H.-R. Jhong, D. S.-H. Wong, C.-C. Wan, Y.-Y. Wang, and T.-C. Wei, "A novel deep eutectic solvent-based ionic liquid used as electrolyte for dye-sensitized solar cells," *Electrochemistry Communications*, vol. 11, no. 1, pp. 209-211, 2009.
- [30] C. L. Boldrini, N. Manfredi, F. M. Perna, V. Trifiletti, V. Capriati, and A. Abboto, "Dye-sensitized solar cells that use an aqueous choline chloride-based deep eutectic solvent as effective electrolyte solution," *Energy Technology*, vol. 5, no. 2, pp. 345-353, 2017.
- [31] B. Bozzini, B. Busson, C. Humbert, C. Mele, and A. Tadjeddine, "Electrochemical fabrication of nanoporous gold decorated with manganese oxide nanowires from eutectic urea/choline chloride ionic liquid. Part III- Electrodeposition of Au-Mn: a study based on in situ Sum-Frequency Generation and Raman spectroscopies," *Electrochim. Acta*, vol. 218, pp. 208-215, 2016.
- [32] Y.-S. Lu, W.-Y. Pan, T.-C. Hung, and Y.-T. Hsieh, "Electrodeposition of silver in a ternary deep eutectic solvent and the electrochemical sensing ability of the Ag-modified electrode for nitrofurazone," *Langmuir*, vol. 36, no. 38, pp. 11358-11365, 2020.
- [33] F. Milano *et al.*, "Functional enzymes in nonaqueous environment: the case of photosynthetic reaction centers in deep eutectic solvents," *ACS Sustainable Chemistry & Engineering*, vol. 5, no. 9, pp. 7768-7776, 2017.
